# Supplementary material for: ESR and CRP are useful between stages of 2-stage revision for periprosthetic joint infection
Source: PubMed Central journal article supplement — Arthroplast Today. 2017 Feb 4;3(3):183–6. doi: 10.1016/j.artd.2016.08.002 (PMC5585765; doi:10.1016/j.artd.2016.08.002), 2017-02-04
Supplement: mmc3.pdf [file mmc3.pdf]

# CONFLICT OF INTEREST STATEMENT

## *Arthroplasty Today*

(Adopted from the American Academy of Orthopaedic Surgeons disclosure statement)

The following form **must be filled out completely and submitted by each author (example, 6 authors, 6 forms). If no discloser is required, please write/type "none" at the end of each sentence.**

### ESR and CRP are Useful Between Stages of 2-Stage Revision for Periprosthetic Joint Infection

Manuscript Title

1. Royalties from a company or supplier (The following conflicts were disclosed)  
**None**
2. Speakers bureau/paid presentations for a company or supplier (The following conflicts were disclosed)  
**Paid speaker for Cadence Pharmaceuticals**
- 3A. Paid employee for a company or supplier (The following conflicts were disclosed)  
**None**
- 3B. Paid consultant for a company or supplier (The following conflicts were disclosed)  
**Paid consultant for SPR Therapeutics**
- 3C. Unpaid consultants for a company or supplier (The following conflicts were disclosed)  
**None**
4. Stock or stock options in a company or supplier (The following conflicts were disclosed)  
**None**
5. Research support from a company or supplier as a Principal Investigator (The following conflicts were disclosed)  
**Paid research for Stryker and Zimmer**
6. Other financial or material support from a company or supplier (The following conflicts were disclosed)  
**None**
7. Royalties, financial or material support from publishers (The following conflicts were disclosed)  
**None**
8. Medical/Orthopaedic publications editorial/governing board (The following conflicts were disclosed)  
**Editorial board member for the Journal of Arthroplasty**
9. Board member/committee appointments for a society (The following conflicts were disclosed)  
**None**

**Each author must sign AND print or type his/her name, date and submit a separate form**

In addition, one BLINDED Conflict of Interest form (no author names used) should be submitted per manuscript with all author disclosures.

Daniel J. Del Gaizo, M.D.

Author Name (Print or Type)

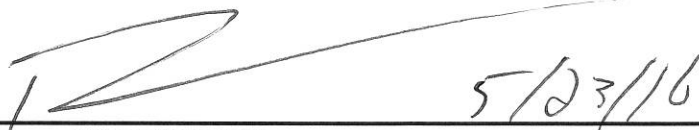

Author Signature

5/23/16

Date
